# Supplementary material
Source: PubMed Central journal article supplement (PMC5553280)
Supplement: NIHMS889865-supplement-1.pdf [file NIHMS889865-supplement-1.pdf]

Supplemental Information

**A Stem Cell-Based High Content Screen to Discover Drug Candidates  
that Inhibit and Repress Zika Virus Infection in the Fetal and Adult Brain**

Ting Zhou, Lei Tan, Gustav Y. Cederquist, Yujie Fan, Brigham J. Hartley,  
Suranjit Mukherjee, Mark Tomishima, Kristen J. Brennand, Qisheng Zhang,  
Robert E. Schwartz, Todd Evans, Lorenz Studer and Shuibing Chen

## Inventory of Supplemental Information

### Supplementary Figures:

**Figure S1.** A high content chemical screen identifies anti-ZIKV drug candidates that promote proliferation in hNPCs. Related to Figure 1.

**Figure S2.** HH, but not AQ, efficiently eliminates virus in ZIKV infected hNPCs. Related to Figure 2.

**Figure S3.** HH, but not AQ, suppresses virus propagation in ZIKV-infected human forebrain organoids. Related to Figure 3.

**Figure S4.** AQ and HH suppresses ZIKV infection *in vivo*. Related with Figure 4.

### Supplementary Tables:

**Table S1.** Information of confirmed hit compounds. Related to Figure 1.

**Table S2.** Primer sets used in RT and qPCR, and probes used in qPCR. The strand-specific tag is highlighted by italic font. Related to Figure 1 to 4, and STAR Methods.

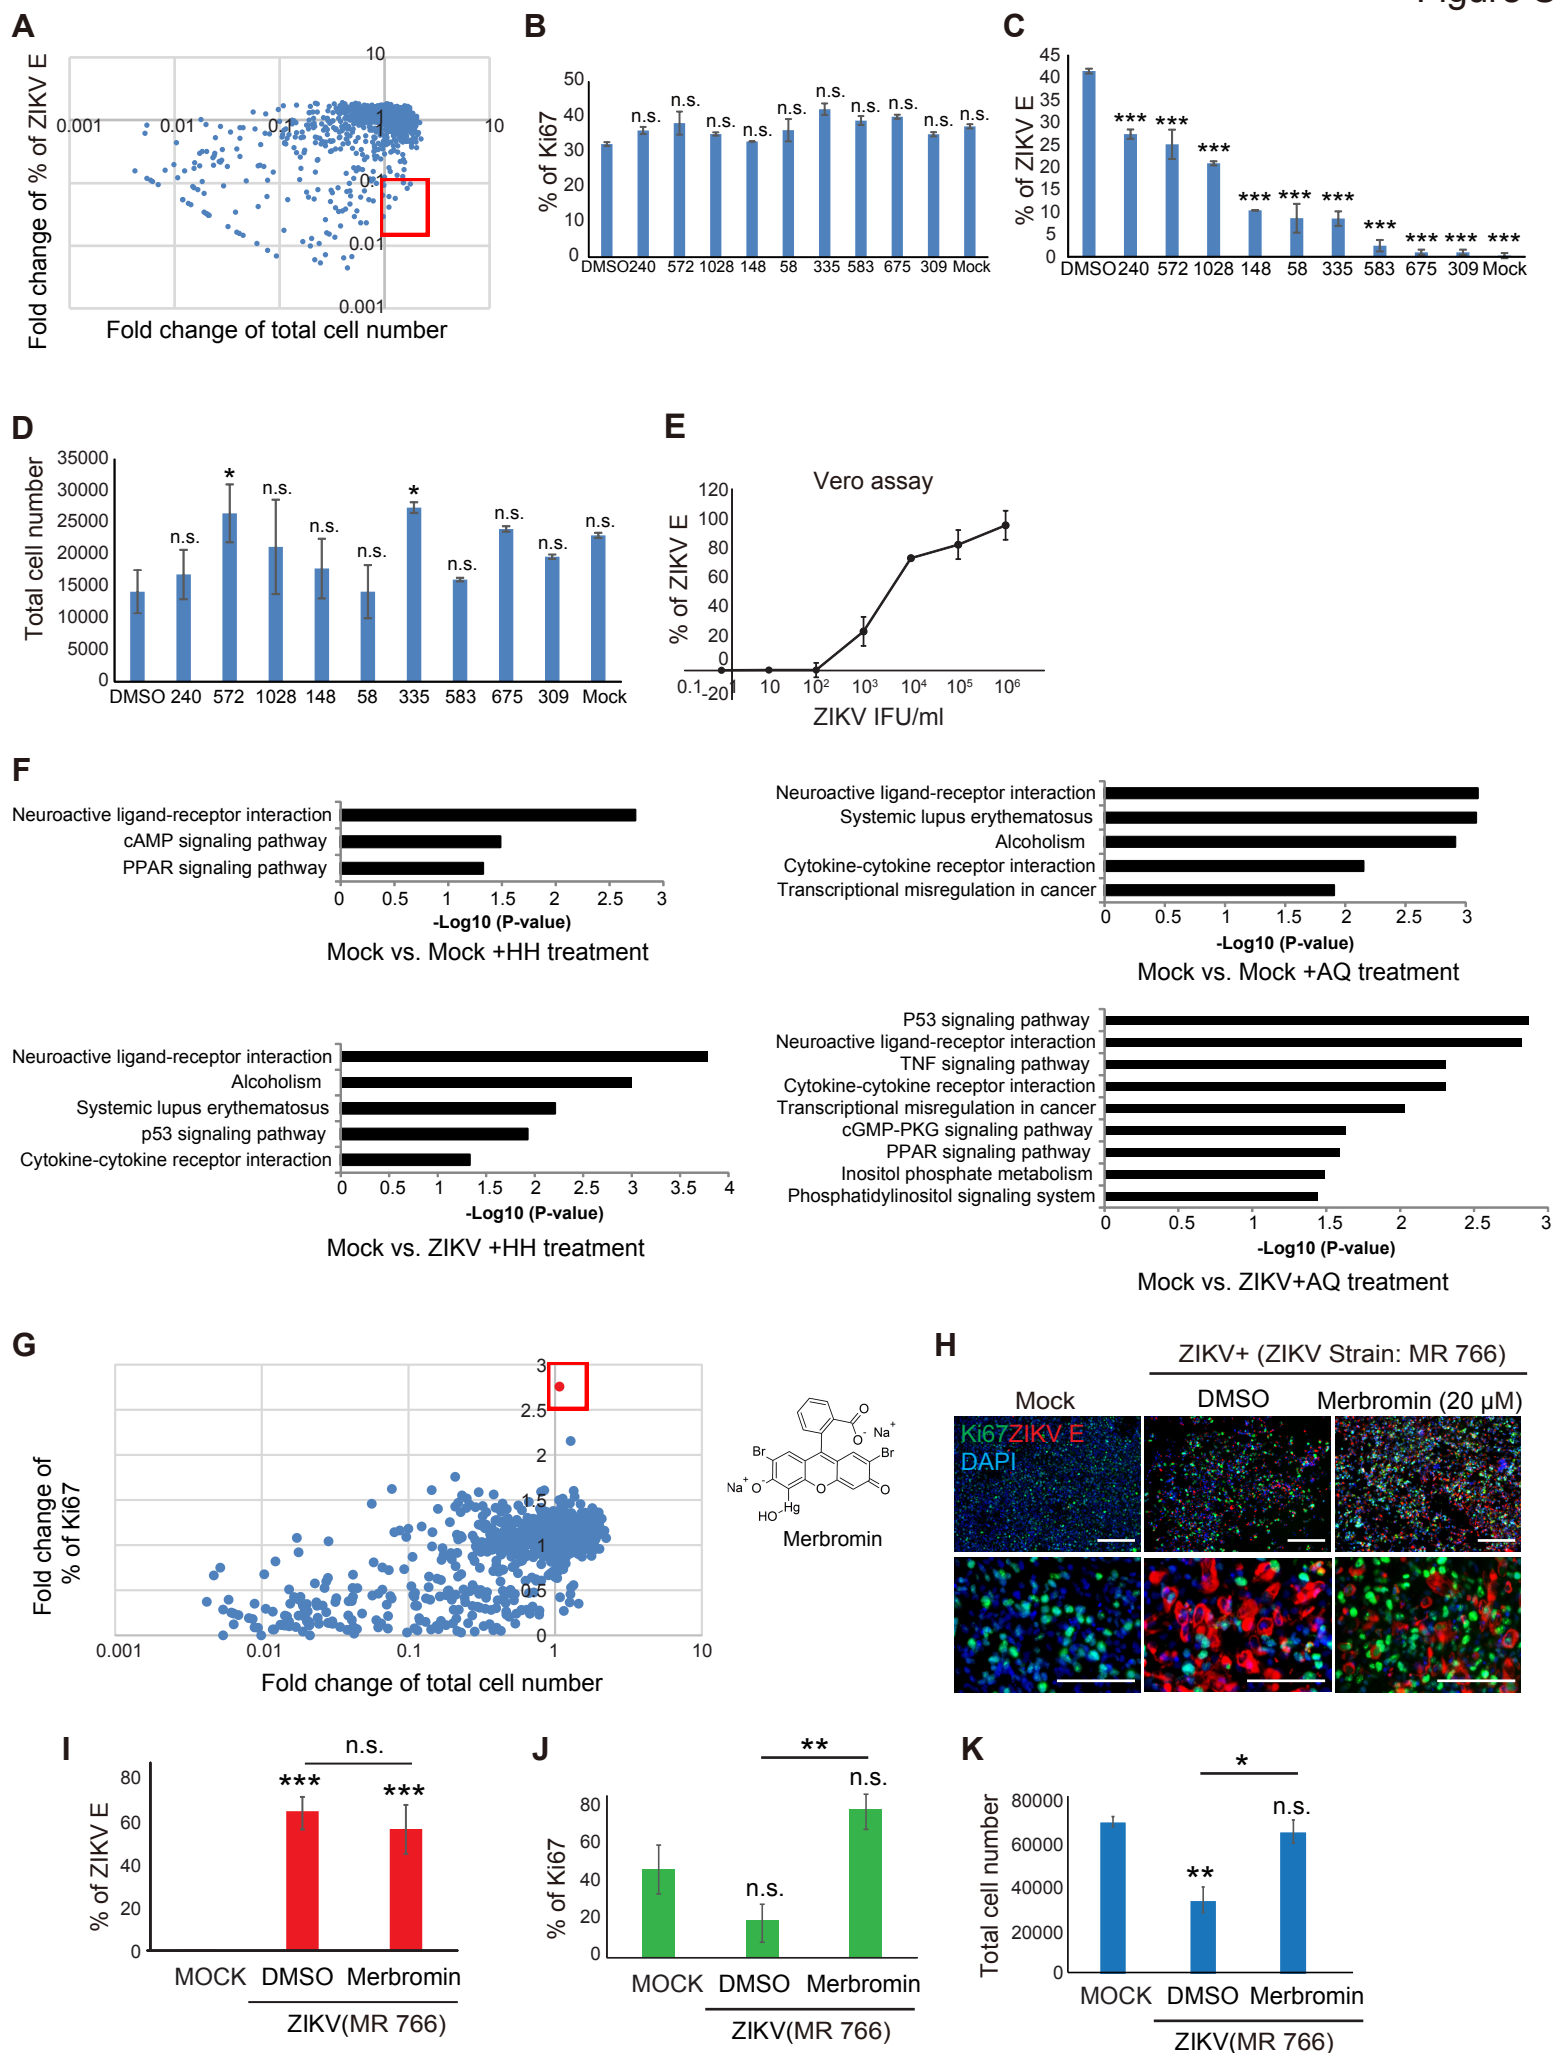

**Figure S1. A high content chemical screen identifies anti-ZIKV drug candidates that promote proliferation in hNPCs. Related to Figure 1.**

(A) Two dimensional analysis of anti-ZIKV drug screen. X-axis represents the fold change of total cell number, which was calculated by dividing the total cell number of the chemical treated well by the average total cell number of DMSO treated wells. Y-axis represents the fold change of the percentage of ZIKV infected cells, which was calculated by dividing the percentage of ZIKV E expressing cells of the chemical-treated well by the average percentage of ZIKV E expressing cells in DMSO-treated wells. The compounds, in which the fold change of total cell number >1 and the fold change of the percentage of ZIKV infection <20% were picked for subsequent evaluation.

(B-D) The quantification of proliferation rate (B), the percentage of ZIKV E<sup>+</sup> cells (C) and total cell number (D) of hNPCs at 72 h after ZIKV infection with primary hit compounds or DMSO treatment (n=3). *p* values were calculated by one-way repeated measures ANOVA with a Bonferroni test for multiple comparisons. \**p*<0.05, \*\**p*<0.01 and \*\*\**p*<0.001.

(E) Vero re-infection assay using different ZIKV (MR766 strain) titers to determine the sensitivity.

(F) Gene ontology pathway analysis of genes that are more than two fold differentially expressed in Mock vs. HH, Mock vs. HH+ZIKV, Mock vs. AQ and Mock vs. AQ+ZIKV among the genes selected in Figure 1L.

(G) Two dimensional analysis of compound screen and the chemical structure of the hit compound Merbromin. The analysis sought compounds that increase cell proliferation rates in ZIKV-infected hNPCs. The X-axis represents the fold change of total cell number, which was calculated by dividing the total cell number of the chemical treated wells by the average of total cell number of DMSO treated wells. The Y-axis represents the fold change of cell proliferation rate, which was calculated by dividing the percentage of Ki67<sup>+</sup> cells of the chemical treated well by the average of the percentage of Ki67<sup>+</sup> cells of DMSO treated wells. One hit compound, for which the fold change of total cell number >1 and the fold change of the percentage of Ki67<sup>+</sup> cells > 2.5 was picked for follow-up evaluation.

(H-K) Immunocytochemical analysis (H), the quantification of the percentage of ZIKV E<sup>+</sup> cells (I), the quantification of the proliferation rate (J) and the quantification of the total cell number (K) of hNPCs at 72 h after ZIKV infection with 20 μM Merbromin or DMSO treatment (n=3). Cells were fixed and stained for Ki67 (green), ZIKV E (red) and DAPI (blue). Scale bars, 100 μm. *p* values were calculated by unpaired two-tailed Student's t-test. \**p*<0.05, \*\**p*<0.01 and \*\*\**p*<0.001, unless otherwise stated.

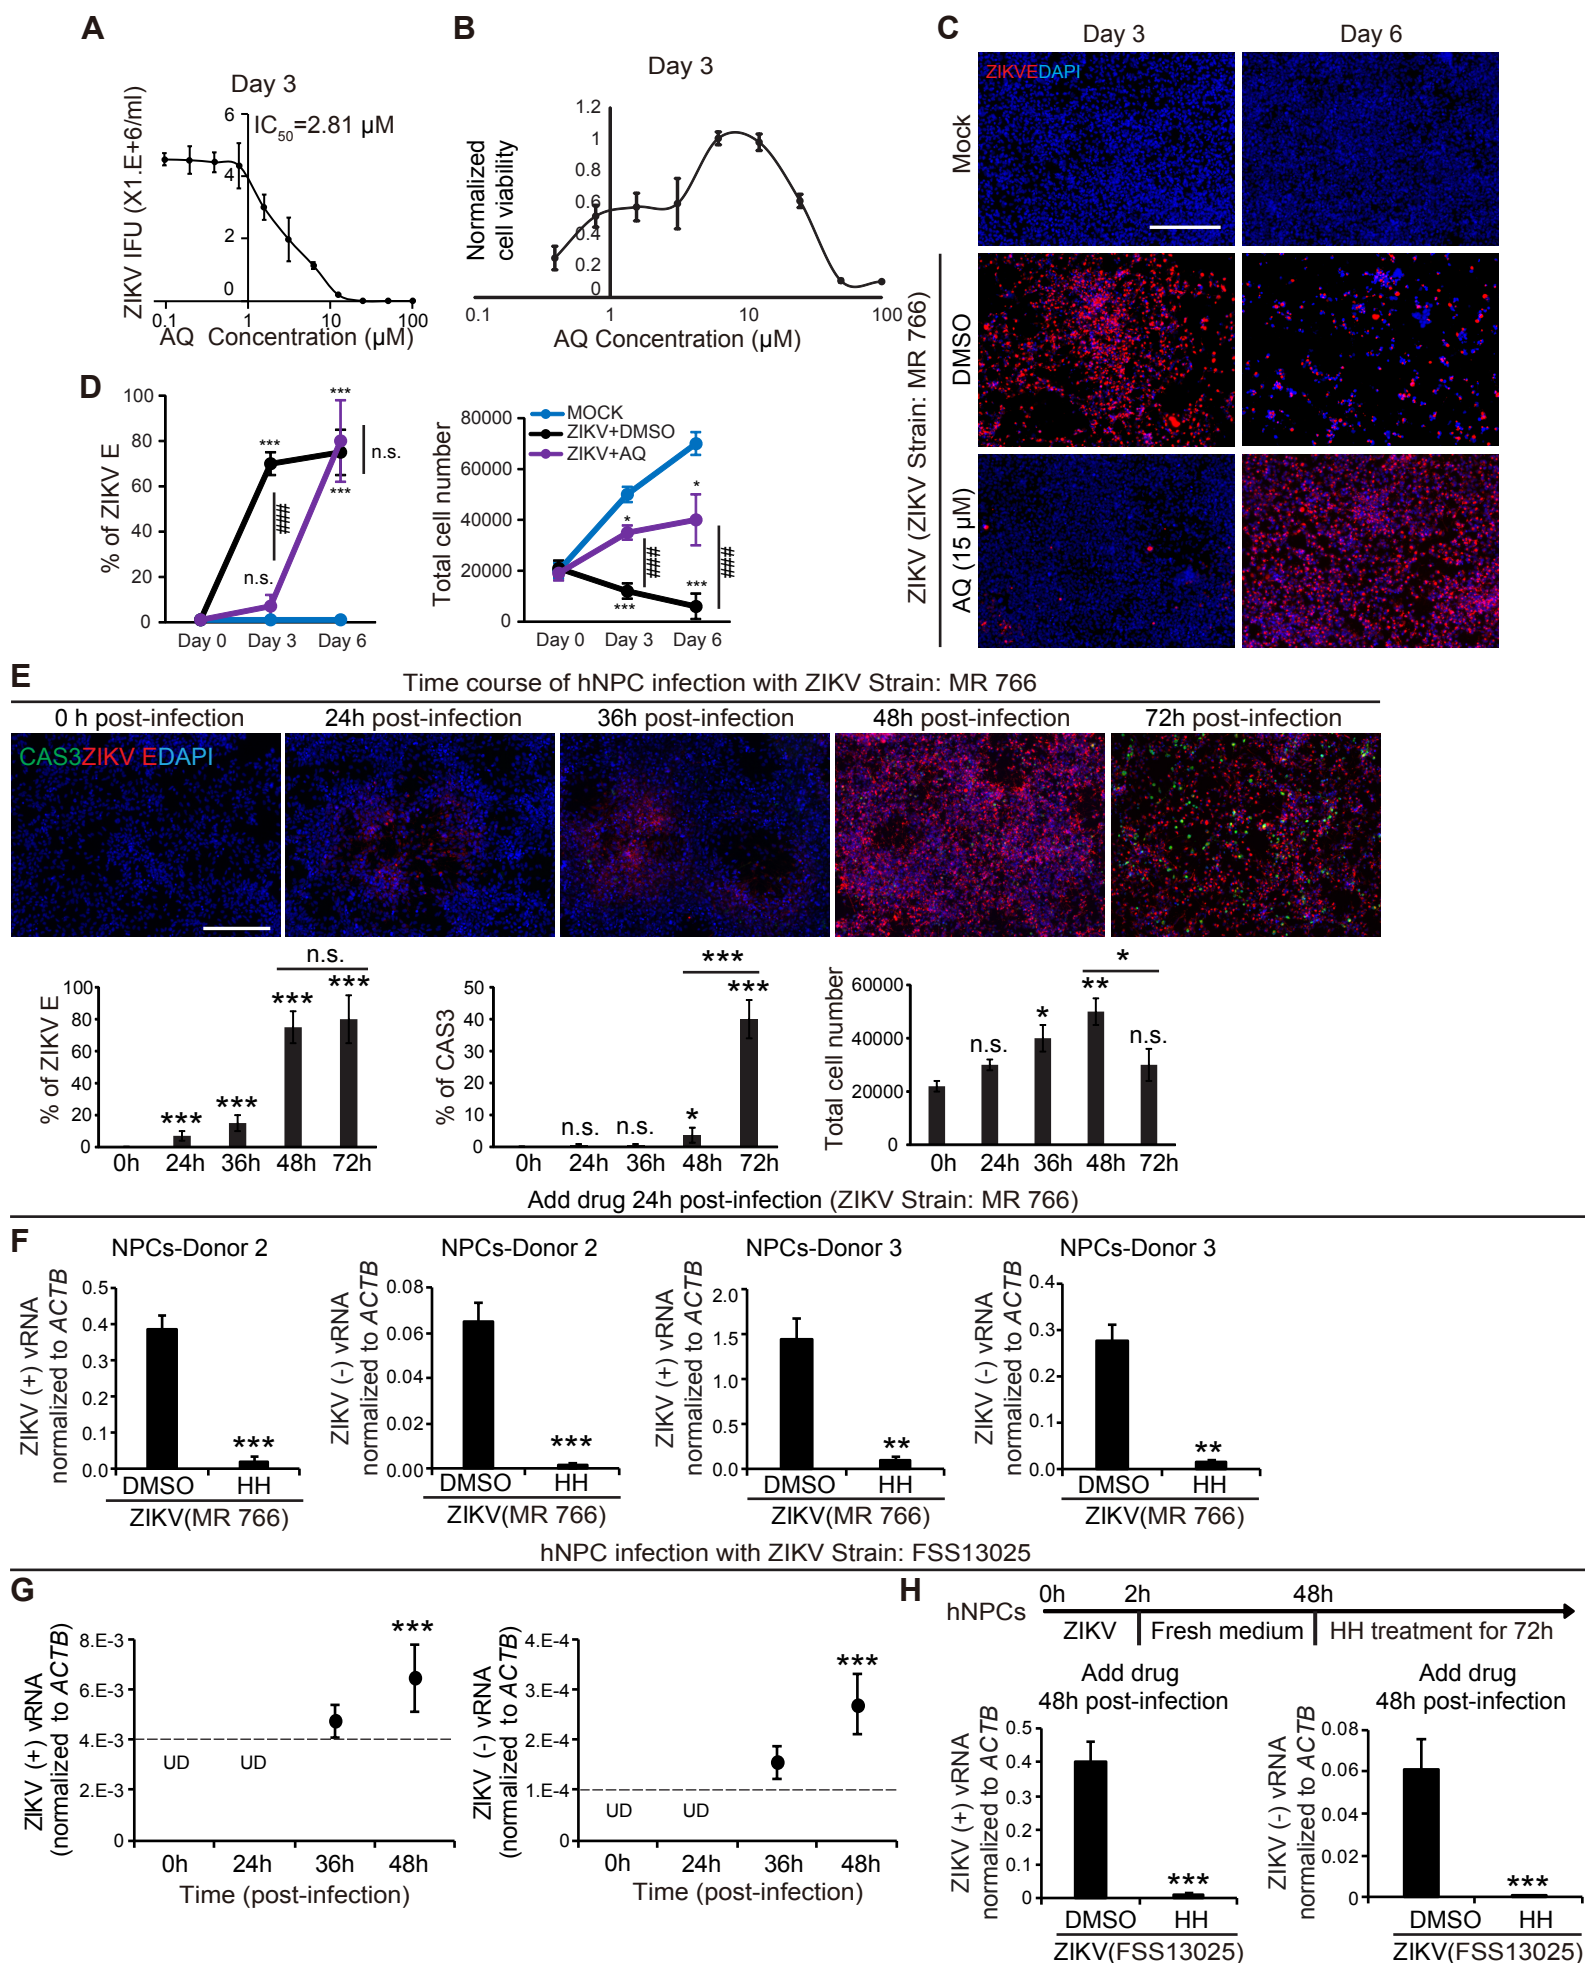

**Figure S2. HH, but not AQ, efficiently eliminates virus in ZIKV infected hNPCs. Related to Figure 2.**

(A) Inhibitory curve of AQ calculated based on infectious particles in supernatant as determined by the Vero reinfection assay (n=3).

(B) Effective curve of AQ calculated based on normalized cell viability (n=3).

(C and D) Immunocytochemistry analysis (C) and quantification of the percentage of ZIKV E<sup>+</sup> cells and total cell number (D) of hNPCs after ZIKV infection treated with 15  $\mu$ M AQ or DMSO or mock infection (n=3). Cells were fixed and stained for ZIKV E (red) and with DAPI (blue). Scale bars, 100  $\mu$ m. *p* values were calculated by one-way repeated measures ANOVA with a Bonferroni test for multiple comparisons. \**p*<0.05, \*\**p*<0.01 and \*\*\**p*<0.001.

(E) Time course staining and quantification of the percentage of ZIKV E<sup>+</sup> cells, the percentage of CAS3<sup>+</sup> cells, and the total cell number at 24 h, 36 h, 48 h and 72 h post-infection.(n=3)..

(F) qRT-PCR analysis of (+) strand and replicating (-) strand of ZIKV (MR766 strain) vRNA level in hNPCs from two additional donors. hNPCs from different donors were treated with 25  $\mu$ M HH at 24 h post-infection.

(G) The expression dynamics of ZIKV vRNA (FSS13025 strain) in hNPCs. qRT-PCR analysis to quantify the (+) strand and replicating (-) strand ZIKV vRNA levels in hNPCs at different time points post-infection. The dash line shows qRT-PCR detection limit. *p* values were calculated by one-way repeated measures ANOVA with a Bonferroni test for multiple comparisons. \**p*<0.05, \*\**p*<0.01 and \*\*\**p*<0.001. UD, undetectable.

(H) qRT-PCR analysis of hNPCs that were treated with 25  $\mu$ M HH or DMSO at 48 h post-ZIKV (FSS13025 strain) infection and maintained for additional 3 days.

*p* values were calculated by unpaired two-tailed Student's *t*-test. \**p*<0.05, \*\**p*<0.01 and \*\*\**p*<0.001, unless otherwise stated.

Figure S3

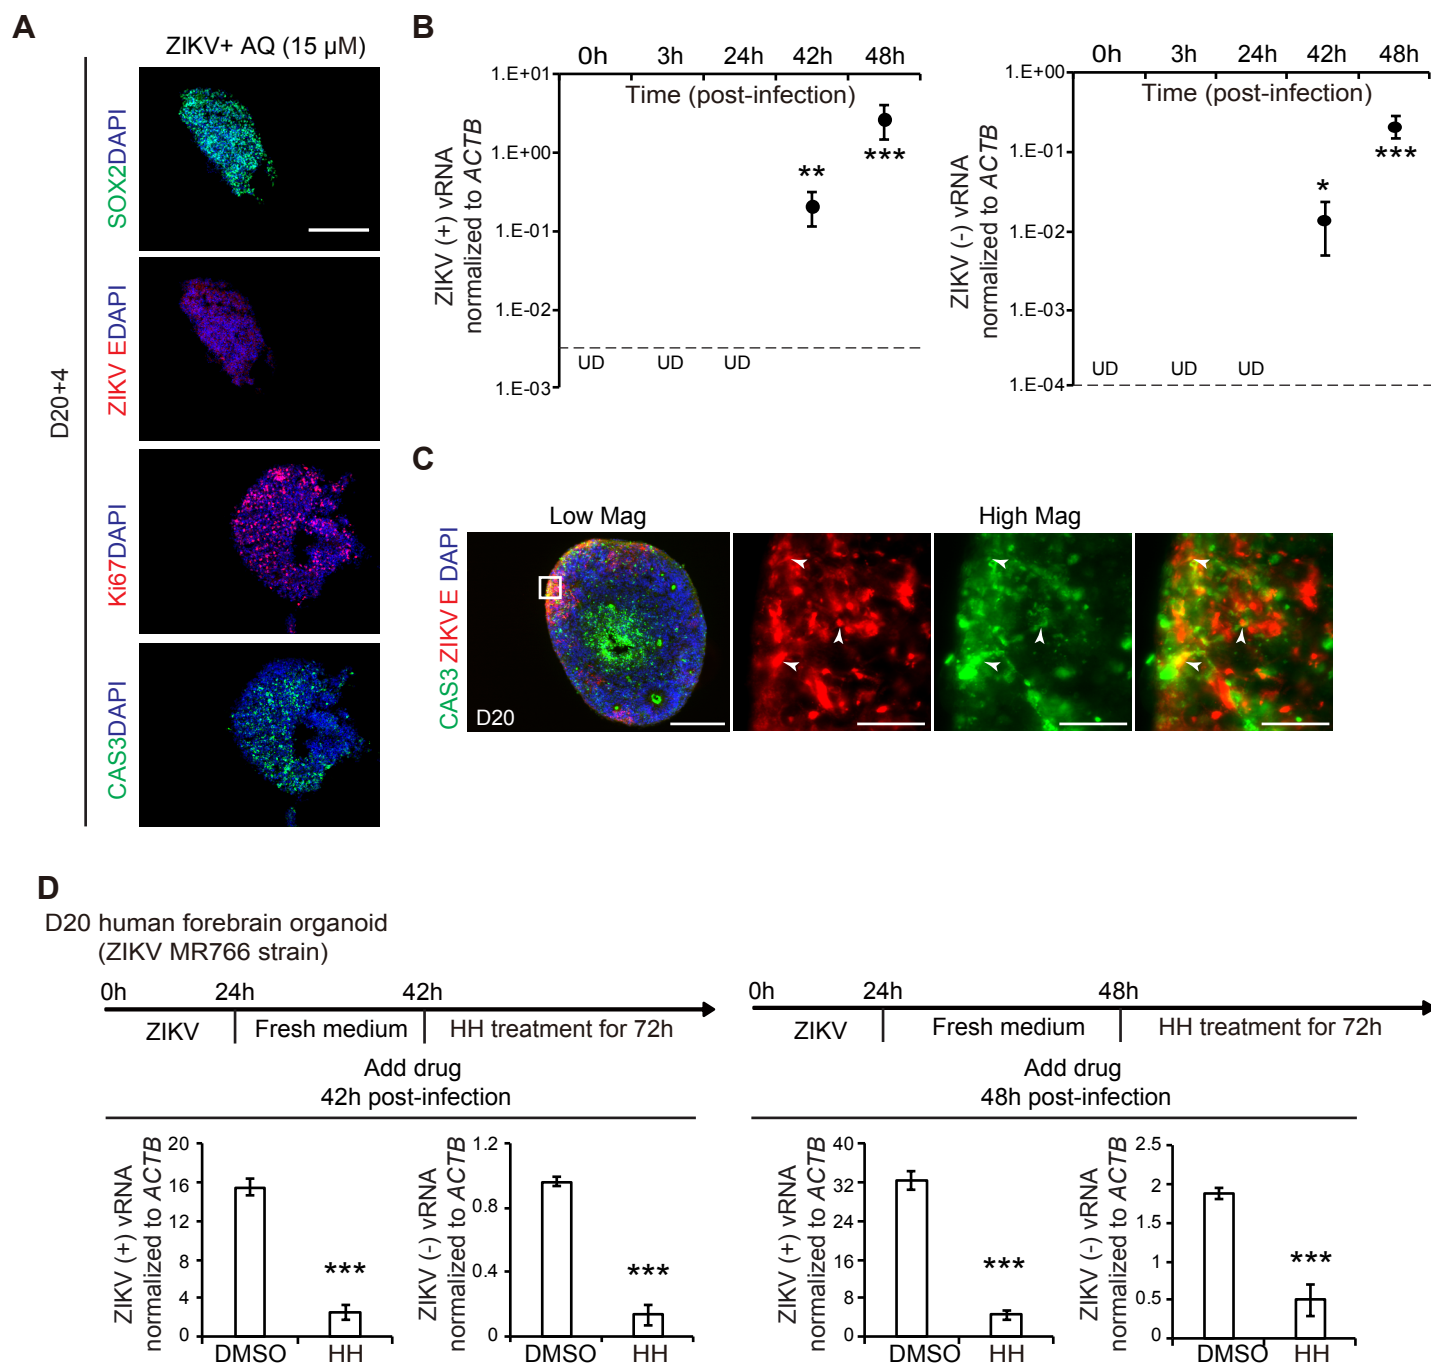

**Figure S3. HH, but not AQ, suppresses virus propagation in ZIKV-infected human forebrain organoids. Related to Figure 3.**

(A) AQ reduced ZIKV infection, but also induced toxicity in short-term organoid cultures. Immunocytochemical analysis of D20+4 ZIKV-infected organoids treated with 15  $\mu$ M AQ or DMSO or with mock infection (n=3). D20+4 organoids were stained for SOX2 (green), ZIKV E (red) and with DAPI to monitor the percentage of ZIKV E<sup>+</sup> cells. D20+4 organoids were also stained for Ki67 (green), CAS3 (red) and with DAPI to monitor the cell proliferation and apoptosis rate. Treatment with AQ reduces ZIKV infection, but increases cell apoptosis rate. Scale bars, 100  $\mu$ m.

(B) The expression dynamics of ZIKV vRNA (MR766 strain) in human forebrain organoids. qRT-PCR analysis to quantify the (+) strand and replicating (-) strand vRNA levels in the human forebrain organoids at different time points post-infection. The dash line shows qRT-PCR detection limit. *p* values were calculated by one-way repeated measures ANOVA with a Bonferroni test for multiple comparisons. \**p*<0.05, \*\**p*<0.01 and \*\*\**p*<0.001. UD, undetectable.

(C) The immunostaining of ZIKV E and CAS3 in human forebrain organoids at 42 h post-infection. Scale bars, 100  $\mu$ m in low mag figure panel; Scale bars, 20  $\mu$ m in high mag figure panels.

(D) qRT-PCR analysis of human forebrain organoids that were treated with 25  $\mu$ M HH or DMSO at 42 h or 48 h post-ZIKV (MR766 strain) infection and maintained for additional 3 days. *p* values were calculated by unpaired two-tailed Student's t-test. \**p*<0.05, \*\**p*<0.01 and \*\*\**p*<0.001, if not mentioned specifically.

Figure S4

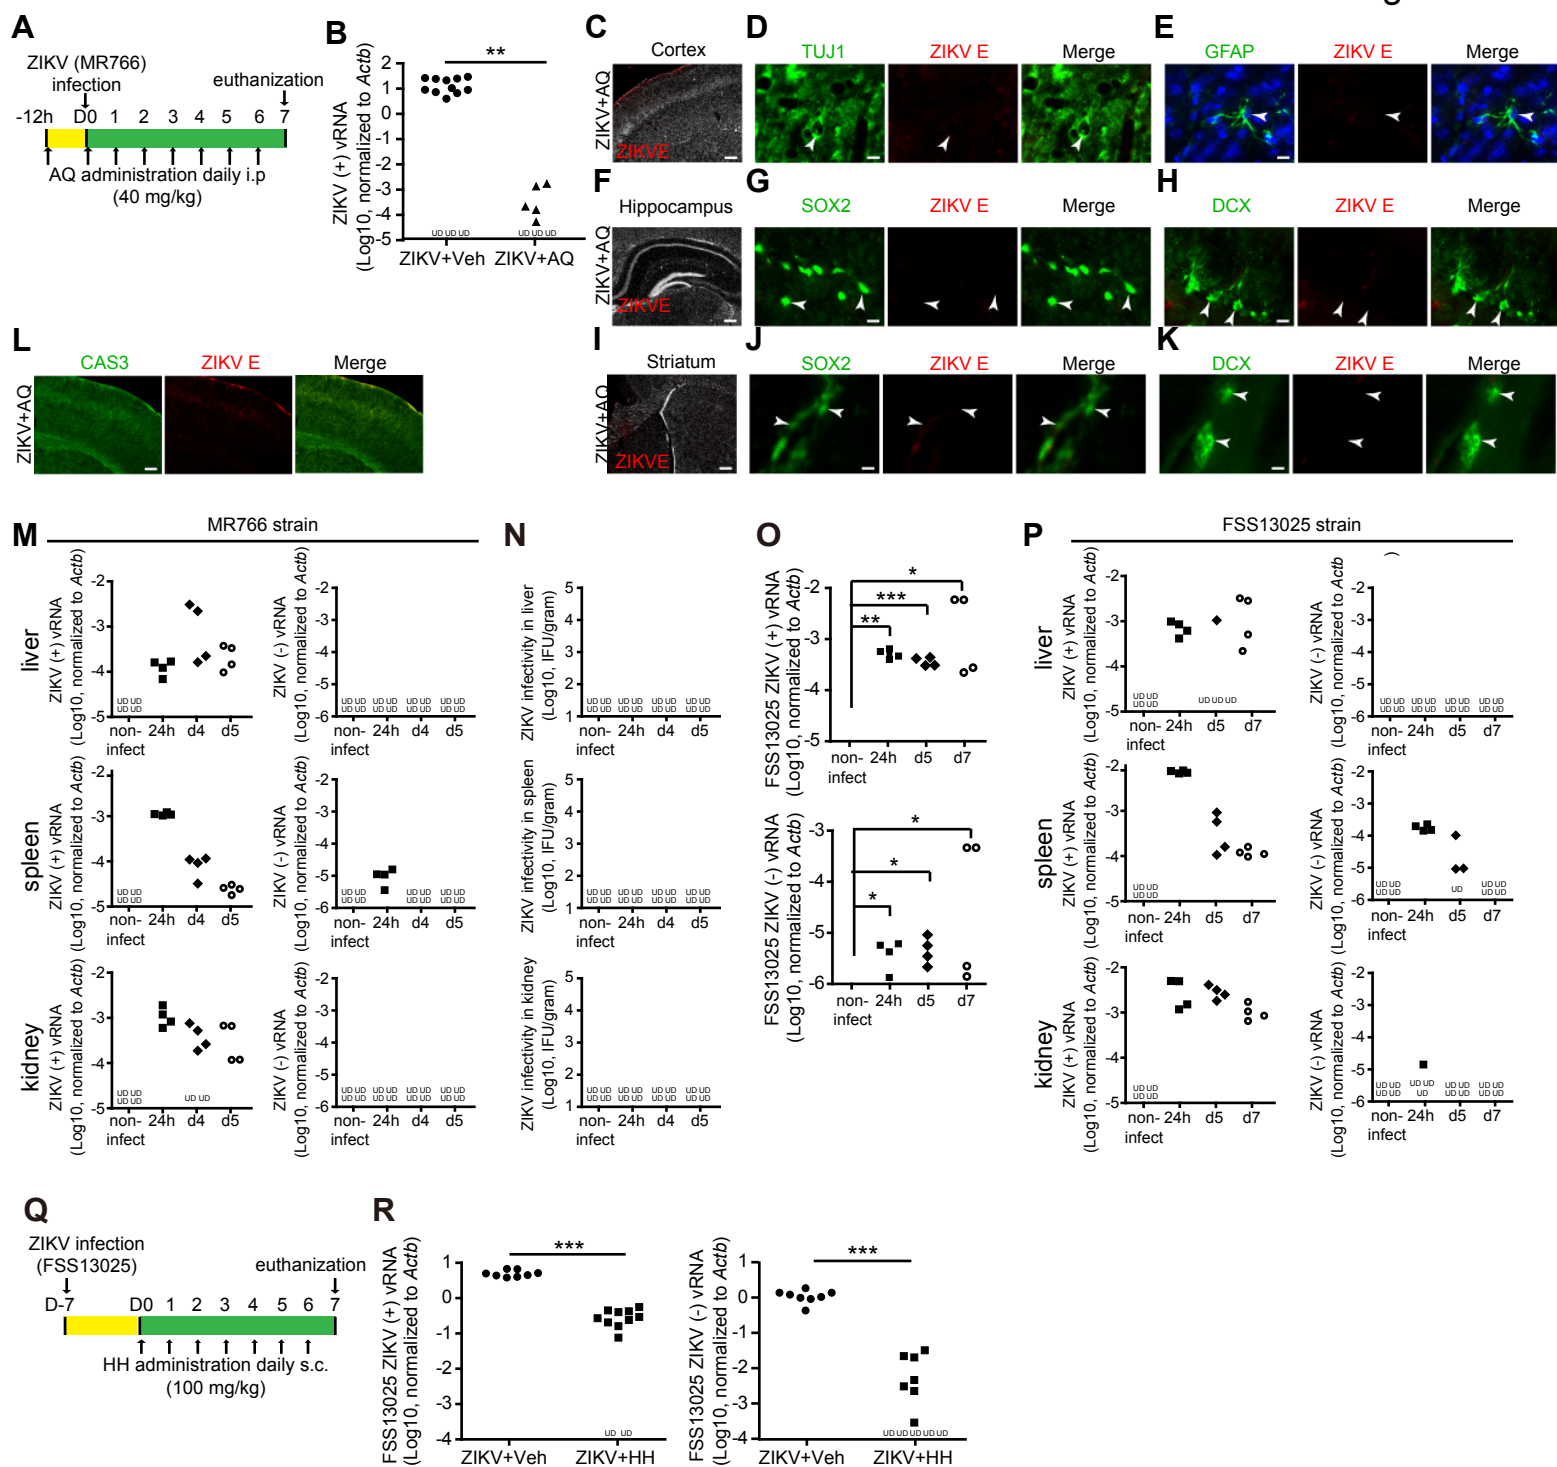

**Figure S4. AQ and HH suppresses ZIKV infection *in vivo*. Related with Figure 4.**

(A) Scheme of prophylactic treatment of AQ *in vivo*. AQ was administrated to SCID-beige mice 12 h before infection with MR766 virus strain. AQ was injected at a dose of 40 mg/kg/day subcutaneously and euthanized at day 7.

(B) qRT-PCR analysis of ZIKV vRNA (+) strand in brains of ZIKV-infected mice treated with vehicle (n=14) or AQ (n=8).

(C-E) Immunohistochemical analysis of ZIKV in adult cortex of AQ-treated ZIKV infected mice (C), and co-staining with neuron marker TUJ1 (D) and astrocyte marker GFAP (E). AQ suppresses infection in adult cortex. Scale bar=100  $\mu$ m in (C) and 10  $\mu$ m in (D, E).

(F-H) Immunohistochemical analysis of ZIKV in adult hippocampus of AQ-treated ZIKV infected mice (F), and co-staining with neural progenitor marker SOX2 (G) and immature neuron marker DCX (H). AQ suppresses infection in adult hippocampus. Scale bar, 100  $\mu$ m in (F) and 10  $\mu$ m in (G, H).

(I-K) Immunohistochemical analysis of ZIKV in adult striatum of AQ-treated ZIKV infected mice (I), and co-staining with neural progenitor marker SOX2 (J) and immature neuron marker DCX (K). AQ suppresses infection in adult striatum. Scale bar, 100  $\mu$ m in (H) and 10  $\mu$ m in (J, K).

(L) Immunohistochemical analysis of cell apoptosis in brain of ZIKV infected mice treated with AQ. No apoptosis is detected in the presence of AQ. Scale bar, 100  $\mu$ m.

(M, N) Expression kinetics of (+) strand (S4M, left) and (-) strand (S4M, right) of ZIKV vRNA and infectious viral particles (N) of MR766 strain in liver, spleen, and kidney. n is larger or equal to 4 mice at each time points. The mice were inoculated with  $1 \times 10^6$  PFU of virus through intraperitoneal injection and then euthanized at 24 h, 4 days and 5 days post-infection.

(O) Expression kinetics of (+) strand vRNA (left) and (-) strand vRNA (right) of ZIKV (FSS13025 strain) in mouse brain. N is larger or equal to 4 mice at each time points. The mice were inoculated with ( $1 \times 10^7$  PFU) through intraperitoneal injection. The mice were euthanized at 24 h, 5 days and 7 days post-infection.

(P) Expression kinetics of (+) strand (left) and (-) strand (right) of FSS13025 strain ZIKV vRNA in liver, spleen, and kidney. N is larger or equal to 4 mice at each time points. The mice were inoculated with  $1 \times 10^7$  PFU of virus through intraperitoneal injection and then euthanized at 24 h, 5 days and 7 days post-infection.

(Q) Scheme of therapeutic treatment of HH on ZIKV (FSS13025 strain) infected mice. The SCID-beige mice were infected with ZIKV (FSS13025 strain,  $1 \times 10^7$  PFU). The mice at 7 days post-infection were treated with 100 mg/kg HH or vehicle daily for 7 days. The mice were euthanized after 7 days treatment and RNA from brains was analyzed using qRT-PCR. The data were presented in Figure S4R.

(R) qRT-PCR analysis of (+) strand vRNA (left) and (-) strand vRNA (right) in the brains of mice treated with vehicle (n=8) or HH (n=12) for 7 days starting at day 7 post-infection.

p values were calculated by one-way repeated measures ANOVA or two-way repeated measures ANOVA with a Bonferroni test for multiple comparisons. \* $p < 0.05$ , \*\* $p < 0.01$ , \*\*\* $p < 0.001$ . UD, undetectable.

Related with Figure 4.

**Table S1. Information of confirmed hit compounds. Related to Figure 1.**

| Chemical name                        | CAS number | Therapeutic group         | Number in library |
|--------------------------------------|------------|---------------------------|-------------------|
| Proglumide                           | 6620-60-6  | Anti-ulcerative           | 240               |
| Mometasone furoate                   | 83919-23-7 | Anti-inflammatory         | 572               |
| Benzathine benzylpenicillin          | 5928-84-7  | Anti-bacterial            | 1028              |
| Canrenoic acid potassium salt        | 2181-04-6  | Anti-hypercholesterolemic | 148               |
| Oxethazaine                          | 126-27-2   | Local anesthetic          | 58                |
| Zaprinast                            | 37762-06-4 | Erectogen                 | 335               |
| Papaverine hydrochloride             | 61-25-6    | Vasodilator               | 583               |
| Hippeastrine hydrobromide            | 22352-41-6 | Hypotensor                | 675               |
| Amodiaquin dihydrochloride dihydrate | 6398-98-7  | Antimalarial              | 309               |

**Table S2. Primer sets used in RT and qPCR, and probes used in qPCR. The strand-specific tag is highlighted by italic font. Related to Figure 1 to 4, and STAR Methods.**

|                           |                                                                     |
|---------------------------|---------------------------------------------------------------------|
| ZIKV (+) vRNA-RT          | <i>TACTTGTACAGCTCGTCCAT</i> GCCCAACGTTCTTTGCAGACAT                  |
| ZIKV (+) vRNA-PCR forward | CCGCTGCCCAACACAAG                                                   |
| ZIKV (+) vRNA-PCR reverse | TACTTGTACAGCTCGTCCATG                                               |
| ZIKV (+) vRNA-PCR probe   | 5'-/56-<br>FAM/AGCCTACCT/ZEN/TGACAAGCAATCAGACACTCAA/3IABkFQ/-<br>3' |
| ZIKV (-) vRNA-RT          | <i>AACAGCCACAACGTCTATAT</i> CCCGCTGCCCAACACAAG                      |
| ZIKV (-) vRNA-PCR forward | AACAGCCACAACGTCTATATC                                               |
| ZIKV (-) vRNA-PCR reverse | CCACTAACGTTCTTTGCAGACAT                                             |
| ZIKV (-) vRNA-PCR probe   | 5'-/56<br>FAM/TTGAGTGTC/ZEN/TGATTGCTTGTC AAGGTAGGCT/3IABkFQ/-<br>3' |
| Human ACTB-RT             | CCTGGATAGCAACGTACATGG                                               |
| Human ACTB-PCR forward    | CCTTGACATGCCGGAG                                                    |
| Human ACTB-PCR reverse    | ACAGAGCCTCGCCTTTG                                                   |
| Human ACTB-PCR probe      | 5'-/5HEX/TCATCCATG/ZEN/GTGAGCTGGCGG/3IABkFQ/-3'                     |
| Mouse Actb-RT             | CTGGATGGCTACGTACATGC                                                |
| Mouse Actb -PCR forward   | ATGCCGGAGCCGTTGTC                                                   |
| Mouse Actb -PCR reverse   | GCGAGCACAGCTTCTTTG                                                  |
| Mouse Actb -PCR probe     | 5'-/5HEX/CCGCCACCA/ZEN/GTTCGCCATG/3IABkFQ/-3'                       |
